# Supplementary material
Source: Springer Nature journal article supplement (https://www.springermedizin.de/resource/supplementary/13041_2008_26_MOESM3_ESM.pdf/25657438)

**a**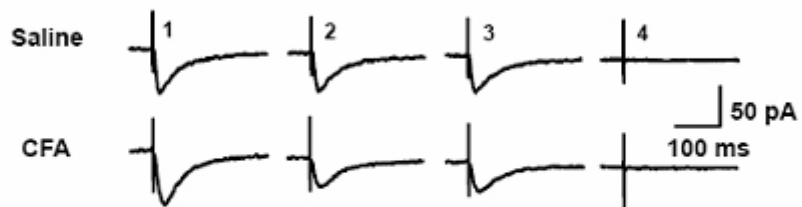**b**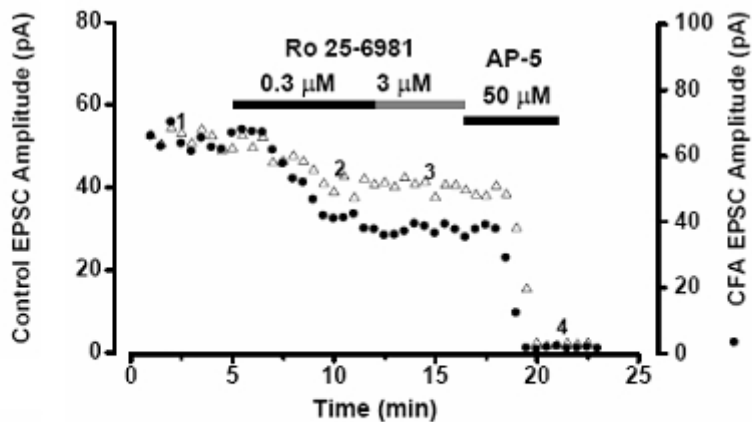

Supplement: MOESM3 [file 25657438]
